# Supplementary material for: Exome Sequencing in 200 Intellectual Disability/Autistic Patients: New Candidates and Atypical Presentations
Source: MDPI journal article supplement (doi:10.3390/brainsci11070936), 2021-07-16
Supplement: s1 [file s1]

**Table S3.** P/LP variants identified in candidate disease genes.

| Patient | Gene     | Status       | Transcript (hg19) | Genomic DNA position    | Variant (HGVS)  | Protein (HGVS) | Location (Exon/ Intron) | Variant effect | dbSNP       | MAF (gnomad %) | origin  |
|---------|----------|--------------|-------------------|-------------------------|-----------------|----------------|-------------------------|----------------|-------------|----------------|---------|
| #44     | CACNA2D1 | heterozygous | NM_000722.2       | 7:81695840_81695841insT | c.659-1_659insA | NA             | 7                       | splicing       | NR          | NR             | de novo |
| #45     | GPR14    | heterozygous | NM_018949.3       | 17:80333044             | c.844C>T        | p.(Gln282*)    | 3                       | nonsense       | rs577182190 | 0.0023 %       | de novo |

HGVS, Human Genome Variation Society (<http://www.hgvs.org>); MAF (Minor Allele Frequency); NA, not applicable; NR, not reported.
