# Supplementary material for: Exome Sequencing in 200 Intellectual Disability/Autistic Patients: New Candidates and Atypical Presentations
Source: MDPI journal article supplement (doi:10.3390/brainsci11070936), 2021-07-16
Supplement: s1 [file s1]

**Table S1.** Clinical features of the 200 ID and ID/ASD patients.

| Patient | Gender | Age (years) | ID/ASD     | Craniofacial dysmorphisms                                                                                                                                                       | Additional clinical signs                                                                                                                                           |
|---------|--------|-------------|------------|---------------------------------------------------------------------------------------------------------------------------------------------------------------------------------|---------------------------------------------------------------------------------------------------------------------------------------------------------------------|
| #1      | Male   | 7           | ID         | Yes (Plagiocephaly, prominent forehead, sparse eyebrows, broad nasal bridge, small ears, uplifted earlobes, conical teeth)                                                      | Bilateral clinodactyly of the 5th toe, supernumerary nipple, epilepsy, heteroaggressive behaviour                                                                   |
| #2      | Female | 18          | ID         | Yes (microcephaly, triangular face, widow's peak, thick eyebrows, large nose, flat philtrum, thin lips, High vaulted and narrow palate)                                         | Short stature, clinodactyly of the fifth finger, laryngomalacia, splenium thinning, epilepsy, hearing loss, flat foot, stereotypies, speech defect                  |
| #3      | Female | 22          | ID         | No                                                                                                                                                                              | Epilepsy, ataxia, limited speech                                                                                                                                    |
| #4      | Male   | 14          | ID and ASD | Yes (low hairline, periorbital swelling, big mouth, full lips)                                                                                                                  | Stereotypies                                                                                                                                                        |
| #5      | Female | 22          | ID         | Yes (elongated facies, prominent ears, high nasal bridge, open mouth and protruded tongue)                                                                                      | Dystonia, myoclonia, drug-resistant epilepsy, language delay, psychomotor delay, bruxism, hypertrichosis                                                            |
| #6      | Female | 16          | ID         | Yes (facies with coarse features, synophria, bulbous nose, large ears, large mouth)                                                                                             | Dystonia, myoclonia, hypertrichosis, language delay, drug-resistant epilepsy, psychomotor delay                                                                     |
| #7      | Male   | 14          | ID         | Yes (Craniosynostosis, long filter, long eyelashes, thin upper lip)                                                                                                             | Stereotypies, alternating hemiplegia, language delay                                                                                                                |
| #8      | Female | 20          | ID         | Yes (Open mouth, protruding tongue, narrow palate, dental anomalies)                                                                                                            | Epilepsy, hypotonia, developmental delay, absent language                                                                                                           |
| #9      | Female | 22          | ID         | Yes (broad eyebrows, low anterior and posterior hairline, forehead hypertrichosis, prominent ears, eye asymmetry, large nose with wide nostrils, large mouth, dental anomalies) | Upper limb hypotonia, lower limb hypertonia, recurrent infections, thinning corpus callosum, growth retardation, pectus excavatum, clinodactyly of the 5th fingers. |

|     |        |    |            |                                                                                                                                                                             |                                                                                                                                                                                   |
|-----|--------|----|------------|-----------------------------------------------------------------------------------------------------------------------------------------------------------------------------|-----------------------------------------------------------------------------------------------------------------------------------------------------------------------------------|
| #10 | Male   | 11 | ID         | Yes (low hairline, flattened nasal bridge, bulbous nasal tip, anteverted nostrils, full lips, small and widely spaced teeth, anteverted ears)                               | Epilepsy, language delay                                                                                                                                                          |
| #11 | Female | 12 | ID and ASD | Yes (Microcephaly, long face, smooth and long philtrum, strabismus, upslanting palpebral fissures)                                                                          | Developmental delay, stereotypic hand movements, hypotonia, bruxism, sialorrhea, corpus callosum hypoplasia                                                                       |
| #12 | Male   | 16 | ID         | Yes (Microcephaly, narrow forehead, frontal bossing, depressed nasal bridge, short philtrum, prognathism)                                                                   | Hypotonia, epilepsy, stereotypies, absent language                                                                                                                                |
| #13 | Female | 22 | ID         | Yes (prominent columella, sloping forehead, high and scattered eyebrows, deeply set eyes, nose with anteverted nostrils, narrow palate, prominent incisors, prominent ears) | Hypertrichosis, small hands and feet, joint hyperextensive                                                                                                                        |
| #14 | Female | 4  | ID and ASD | Yes (craniosynostosis, flat forehead, downslanting palpebral fissures, high nasal bridge)                                                                                   | Language delay, hyperchromic and hypochromic spots                                                                                                                                |
| #15 | Male   | 16 | ID         | Yes (proptosis, long eyelashes, synophria, narrow palate, dental anomalies, small mouth and full lips)                                                                      | Bilateral cryptorchidism, psychomotor delay, poor vision, ventricular system dilation, immature hippocampal structures, spastic paraparesis, epilepsy, hypotonia, absent language |
| #16 | Female | 22 | ID         | No                                                                                                                                                                          | Strabismus, cerebral atrophy, sialorrhea, motor problems, bruxism                                                                                                                 |
| #17 | Female | 6  | ID         | Yes (cleft palate, deeply set eyes, high nasal bridge, bulbous nasal tip)                                                                                                   | Language delay, epilepsy, aggressiveness                                                                                                                                          |
| #18 | Male   | 39 | ID and ASD | Yes (triangular facies, high nasal bridge, bulbous nasal tip, open mouth, micrognathia, narrow and downturned eyelids)                                                      | Stereotypies, aggressiveness, bladder anomalies                                                                                                                                   |
| #19 | Female | 16 | ID         | No                                                                                                                                                                          | Spastic paraparesis, behaviour disorder, slight enlargement of the interfolial spaces of the cerebellar hemispheres, hypertone                                                    |

|     |        |    |    |                                                                                                                                                                        |                                                                                                                                                                   |
|-----|--------|----|----|------------------------------------------------------------------------------------------------------------------------------------------------------------------------|-------------------------------------------------------------------------------------------------------------------------------------------------------------------|
| #20 | Female | 10 | ID | Yes (sparse eyebrows, small nose, thin upper lip, dental anomalies, chubby cheeks)                                                                                     | Language delay, cerebellar and worm atrophy, psychomotor delay, brain abnormalities, hypertrichosis, bilateral clinodactyly of the second/third/fourth/fifth toes |
| #21 | Male   | 49 | ID | No                                                                                                                                                                     | Ataxia, spastic paraparesis, angioma, nystagmus, epilepsy                                                                                                         |
| #22 | Male   | 16 | ID | Yes (thick eyebrows, narrow and short eyelids, depressed helix, nose with bulbous tip, thick lips)                                                                     | Hypertrichosis of the legs, arms and lumbar region, large hands, short fifth ray of the foot                                                                      |
| #23 | Female | 2  | ID | No                                                                                                                                                                     | Motor stereotypies, epilepsy, thinning of the corpus callosum, ventricular enlargement                                                                            |
| #24 | Female | 49 | ID | Yes (sparse eyebrows, hypertelorism, narrow eyelids, gingival hypertrophy)                                                                                             | Syndactyly of the second and third toes, small feet, hypertrophy of the limbs and truncal obesity, strabismus                                                     |
| #25 | Male   | 12 | ID | Yes (synophria, horizontal eyebrows, wide nasal tip, anteverted nostrils, long filter, dental anomalies)                                                               | Spastic paraparesis, language delay, polyneuropathy                                                                                                               |
| #26 | Female | 6  | ID | Yes (microcephaly, deeply set eyes, nose with bulbous tip, anteverted nostrils, full lips)                                                                             | Hyperactivity, blepharophimosis, brachydactyly, nail hypoplasia, kidney abnormalities, language delay                                                             |
| #27 | Male   | 12 | ID | Yes (narrow bitemporal diameter, narrow and upward eyelid rims, deep philtrum, prognathism, exaggerated Cupid's bow, buccal rim pointing downwards, uplifted ear lobe) | Hypotonia, obesity                                                                                                                                                |
| #28 | Female | 44 | ID | No                                                                                                                                                                     | Microcephaly, brachydactyly, nail hypoplasia                                                                                                                      |
| #29 | Male   | 2  | ID | Yes (high forehead, low-set ears with large, downward-pointing auricles, down-slanting eyelids, broad nasal tip, long and thick filter, exaggerated Cupid's bow)       | Café au lait spots in the thoracic and lumbar region, nail hypoplasia of the fifth toe, neurodevelopmental delay, cryptorchidism                                  |

|     |        |    |            |                                                                                                    |                                                                                                                                                                                                        |
|-----|--------|----|------------|----------------------------------------------------------------------------------------------------|--------------------------------------------------------------------------------------------------------------------------------------------------------------------------------------------------------|
| #30 | Male   | 18 | ID         | Yes (microcephaly, thick eyebrows, deeply set eyes, square chin)                                   | Epilepsy, thinning corpus callosum, language delay, cold extremities, cerebellar atrophy, muscle hypotrophy                                                                                            |
| #31 | Male   | 45 | ID and ASD | Yes (alopecia in the fronto-temporal region, depressed ocular region, thin upper lip)              | Absent language, obsessive behaviour, tapered fingers with widening of the intermediate interphalangeal joints, nail dystrophy, clinodactyly of the third toe, stereotypies, mouth chewing automatisms |
| #32 | Male   | 21 | ID and ASD | No                                                                                                 | Epilepsy, psychomotor delay                                                                                                                                                                            |
| #33 | Male   | 18 | ID         | No                                                                                                 | Language delay, psychomotor delay, manual stereotypies, increased tolerance to pain                                                                                                                    |
| #34 | Female | 10 | ID         | Yes (high forehead, spaced teeth, pursed lips attitude)                                            | Epilepsy, neurodevelopmental regression, stereotypies, syndactyly                                                                                                                                      |
| #35 | Male   | 17 | ID         | Yes (sloping forehead, prognathism)                                                                | Strabismus, hyperchromic spot in the thoracic area, cerebellar atrophy, language delay, ataxia                                                                                                         |
| #36 | Female | 26 | ID and ASD | No                                                                                                 | Stereotypies, self-harm, cold extremities, sphincter control not acquired, language regression                                                                                                         |
| #37 | Male   | 21 | ID         | Yes (bulbous nasal tip, full lips, spaced teeth)                                                   | Scoliosis, sialorrhoea, optic atrophy, psychomotor delay, epilepsy, spastic paraparesis, absent language.                                                                                              |
| #38 | Male   | 10 | ID and ASD | No                                                                                                 | Gastroesophageal reflux, sphincter control not acquired, stereotyped behaviour                                                                                                                         |
| #39 | Male   | 9  | ID         | Yes (advanced hairline, long and thick eyebrows, anteverted nostrils, long filter, thin upper lip) | Hypoplasia of the cerebellar vermis, thinned corpus callosum, cerebellar asymmetry, angioma, hypertrichosis, epilepsy, apraxia, ataxia and psychomotor delay                                           |

|     |        |    |            |                                                                                                                                                                   |                                                                                       |
|-----|--------|----|------------|-------------------------------------------------------------------------------------------------------------------------------------------------------------------|---------------------------------------------------------------------------------------|
| #40 | Male   | 7  | ID and ASD | Yes (Wide forehead, arched eyebrows, deeply set eyes, pointed chin)                                                                                               | Limited speech, neurodevelopmental delay                                              |
| #41 | Female | 20 | ID         | Yes (thick eyebrows, prominent upper arch, hyperemic gums, high palate)                                                                                           | Limited speech, scoliosis, locomotor impairment, manual stereotypies, tapered fingers |
| #42 | Male   | 6  | ID and ASD | No                                                                                                                                                                | Language delay, oppositional and provocative behaviour                                |
| #43 | Female | 14 | ID         | Yes (microcephaly, synophria, long eyelashes, bulbous nasal tip)                                                                                                  | Hypertrichosis, drug-resistant seizures, spastic tetraparesis, renal failure.         |
| #44 | Female | 14 | ID         | Yes (deeply set eyes, squared facies, bulbous nasal tip, full lips, horizontal eyebrows, enlarged nasal bridge, mouth with downward corners, anteverted nostrils) | Language delay, epilepsy,                                                             |
| #45 | Male   | 6  | ID and ASD | Yes (long and large nose, broad nasal bridge, anteverted nostrils, deep philtrum)                                                                                 | Frequent infections                                                                   |
| #46 | Male   | 15 | ID         | Yes (bulbous nasal tip, long eyelashes)                                                                                                                           | No                                                                                    |
| #47 | Male   | 8  | ID and ASD | No                                                                                                                                                                | Language delay, stereotypies, bruxism                                                 |

|     |        |    |            |                                                                                                                              |                                                                             |
|-----|--------|----|------------|------------------------------------------------------------------------------------------------------------------------------|-----------------------------------------------------------------------------|
| #48 | Male   | 9  | ID and ASD | Yes (absent eyebrows, synophrys, epicanthic folds, bulbous nasal tip, long eyelashes)                                        | Language delay, inverted nipples                                            |
| #49 | Male   | 18 | ID and ASD | No                                                                                                                           | Language delay, manual stereotypies, psychomotor delay, short stature       |
| #50 | Male   | 16 | ID and ASD | Yes (downslanting palpebral rims, synophrys)                                                                                 | Neurodevelopmental regression, epilepsy, bilateral sandal gap               |
| #51 | Male   | 15 | ID         | Yes (external eyelid rim out and up)                                                                                         | Sandal gap, stereotypies, neuro /splanchnocranium disproportion, flat feet. |
| #52 | Male   | 6  | ID         | Yes (downslanting eyelid rims, broad nasal bridge, anteverted nostrils, long eyelashes, horizontal eyebrows, thin upper lip) | Bilateral sandal gap, liqueur spaces expansion, epilepsy                    |
| #53 | Male   | 10 | ID and ASD | Yes (microcephaly)                                                                                                           | Language delay                                                              |
| #54 | Male   | 6  | ID and ASD | No                                                                                                                           | Language delay                                                              |
| #55 | Female | 9  | ID and ASD | Yes (Deep set eyes, anteverted nostrils)                                                                                     | Sandal gap, motor stereotypies, cardiac abnormalities                       |
| #56 | Male   | 42 | ID         | No                                                                                                                           | Spastic paraparesis, epilepsy, language delay                               |
| #57 | Female | 12 | ID         | No                                                                                                                           | Stereotypies, growth delay, respiratory infections, short stature, coloboma |

|     |        |    |            |                                                                                                  |                                                                                                    |
|-----|--------|----|------------|--------------------------------------------------------------------------------------------------|----------------------------------------------------------------------------------------------------|
| #58 | Female | 7  | ID         | Yes (dysmorphic auricles, nose with widened base)                                                | Psychomotor delay, hyperechogenic intestine                                                        |
| #59 | Male   | 20 | ID         | No                                                                                               | Spastic tetraparesis, psychomotor delay                                                            |
| #60 | Female | 13 | ID         | Yes (widow's peak , long face, large ears)                                                       | No                                                                                                 |
| #61 | Male   | 5  | ID and ASD | Yes (thin mouth, low set ears)                                                                   | Clinodactyly, cerebellar lesion                                                                    |
| #62 | Male   | 15 | ID         | Yes (long facies, broad nasal bridge, narrow, advanced hairline on the forehead , piriform nose) | Diffuse muscle hypertrophy, hand stereotypies, leg varism,epilepsy, regression, language delay     |
| #63 | Male   | 15 | ID and ASD | Yes (synophria)                                                                                  | Sandal gap, epilepsy                                                                               |
| #64 | Female | 3  | ID and ASD | Yes (hypertelorism, bulbous nasal tip, Cupid's bow)                                              | Bruxism, language delay, neurodevelopmental delay, stereotypes,                                    |
| #65 | Female | 12 | ID         | Yes (thick eyebrows, tubular nose, thin upper lip)                                               | Stereotypies, bilateral sandal gap, growth delay, trunk-limbs disproportion, dysplasia of the hips |
| #66 | Male   | 16 | ID         | Yes (microcephaly)                                                                               | Psychomotor delay, language delay                                                                  |
| #67 | Male   | 21 | ID and ASD | Yes (macrocephaly)                                                                               | Overgrowth, periventricular leukomalacia                                                           |
| #68 | Female | 17 | ID         | No                                                                                               | Hypoacusia, language delay, psychomotor delay                                                      |

|     |        |    |    |                                                                                                             |                                                                                           |
|-----|--------|----|----|-------------------------------------------------------------------------------------------------------------|-------------------------------------------------------------------------------------------|
| #69 | Male   | 15 | ID | Yes (thick eyebrows, anteverted nostrils, hypertelorism, widened nasal bridge, folded helix, narrow palate) | Tapered fingers, brachydactyly                                                            |
| #70 | Male   | 18 | ID | No                                                                                                          | Cerebellar atrophy, thinning corpus callosum, epilepsy, language delay, psychomotor delay |
| #71 | Male   | 20 | ID | Yes (high and narrow palate, irregularity of the helix of the ear, dental anomaly)                          | Tolerance for pain, spastic tetraparesis, epilepsy, developmental delay                   |
| #72 | Female | 28 | ID | Yes (triangular facies, high nasal bridge, hypoplastic nose wings, mandibular hypoplasia, nystagmus)        | Thyroid tissue agenesis, precocious puberty, hypertrichosis, tremor, muscular hypotrophy, |
| #73 | Male   | 14 | ID | Yes (deep-set eyes, anteverted nostrils, shortness of distal phalanx toes, microcephaly)                    | No                                                                                        |
| #74 | Female | 21 | ID | Yes (microcephaly)                                                                                          | Truncal obesity                                                                           |
| #75 | Female | 8  | ID | Yes (microcephaly)                                                                                          | Low weight, epilepsy, developmental delay.                                                |
| #76 | Male   | 4  | ID | No                                                                                                          | Psychomotor retardation, hypotonia, bruxism                                               |
| #77 | Male   | 10 | ID | No                                                                                                          | Bruxism, stereotyped movements, psychomotor retardation                                   |
| #78 | Female | 44 | ID | Yes (prognathism)                                                                                           | Manual stereotypies along the midline, flat feet                                          |
| #79 | Female | 10 | ID | No                                                                                                          | Psychomotor regression, poor motor development, absence of language                       |



|     |        |    |            |                                                                                             |                                                                                     |
|-----|--------|----|------------|---------------------------------------------------------------------------------------------|-------------------------------------------------------------------------------------|
| #80 | Female | 15 | ID         | Yes (elongated facies, high forehead, high nasal bridge, bulbous tip, hypoplastic nostrils) | No                                                                                  |
| #81 | Female | 13 | ID         | Yes (elongated eyelids, long eyelashes)                                                     | No                                                                                  |
| #82 | Female | 31 | ID         | No                                                                                          | Corpus callosum thickening                                                          |
| #83 | Female | 13 | ID         | Yes (microcephaly)                                                                          | Epilepsy, absence of language                                                       |
| #84 | Female | 19 | ID and ASD | No                                                                                          | Epilepsy, psychomotor delay                                                         |
| #85 | Female | 15 | ID         | Yes (dental anomalies , sinophris, eyelid rims up and out, high and narrow palate)          | Corpus callosum abnormalities.                                                      |
| #86 | Female | 22 | ID         | No                                                                                          | Dystonia, myoclonia, drug-resistant epilepsy                                        |
| #87 | Female | 23 | ID and ASD | No                                                                                          | Manual stereotypies                                                                 |
| #88 | Female | 10 | ID and ASD | Yes (slightly protruding lobes, anteverted nostrils, spaced teeth)                          | Muscular hypotrophy, manual stereotypies, flat feet, clinodactyly of the III finger |
| #89 | Female | 15 | ID and ASD | Yes (macrocephaly)                                                                          | No                                                                                  |
| #90 | Female | 16 | ID and ASD | No                                                                                          | Laryngomalacia, hypotonia, syndactyly,epilepsy                                      |

|             |        |    |            |                                                                                  |                                                                         |
|-------------|--------|----|------------|----------------------------------------------------------------------------------|-------------------------------------------------------------------------|
| <b>#91</b>  | Male   | 28 | ID         | No                                                                               | Cryptorchidism, creatinine deficit                                      |
| <b>#92</b>  | Female | 26 | ID and ASD | No                                                                               | Epilepsy, vesical anomalies, patent oval foramen                        |
| <b>#93</b>  | Male   | 29 | ID and ASD | No                                                                               | Supernumerary nipples                                                   |
| <b>#94</b>  | Male   | 31 | ID and ASD | No                                                                               | Macrocephaly, stains                                                    |
| <b>#95</b>  | Male   | 16 | ID and ASD | Yes (patent foramen ovale, hypochromic stain)                                    | Hypotonia, bruxism, psychomotor delay                                   |
| <b>#96</b>  | Female | 31 | ID and ASD | Yes (macrocephaly)                                                               | Short stature, face and arms hypertrichosis, valgus hallux, obesity     |
| <b>#97</b>  | Male   | 15 | ID and ASD | Yes (dental anomalies)                                                           | Language delay, poor visual contact, psychomotor delay, recurrent fever |
| <b>#98</b>  | Male   | 18 | ID and ASD | No                                                                               | Hearing loss                                                            |
| <b>#99</b>  | Male   | 9  | ID and ASD | No                                                                               | Language delay, hyperchromic stain, angioma                             |
| <b>#100</b> | Male   | 20 | ID and ASD | Yes (micrognathia)                                                               | Absent language                                                         |
| <b>#101</b> | Female | 16 | ID and ASD | Yes (sinophris,nose with bulbous tip, hypoplastic nares, oval facies, deep eyes) | Obesity, ADHD, sandal gap                                               |

|      |        |    |            |                                                                                                |                                                                                    |
|------|--------|----|------------|------------------------------------------------------------------------------------------------|------------------------------------------------------------------------------------|
| #102 | Male   | 10 | ID and ASD | No                                                                                             | Absent language, stereotypies, hypercholesterolemia                                |
| #103 | Female | 21 | ID         | Yes (thick eyebrows, eyes asymmetry, dental anomalies, large nose with wide nostrils)          | Hypotonia, developmental delay, recurrent infection, corpus callosum thinning      |
| #104 | Male   | 9  | ID and ASD | No                                                                                             | Cryptorchidism                                                                     |
| #105 | Female | 16 | ID and ASD | No                                                                                             | Epilepsy, ligamentous hyperlaxity                                                  |
| #106 | Male   | 7  | ID and ASD | No                                                                                             | Motor stereotypies, poor visual contact, bruxism, absent language, bronchospasm    |
| #107 | Male   | 9  | ID and ASD | Yes (bulbous nasal tip, big eyes, big ears, micrognathia)                                      | Motor stereotypies                                                                 |
| #108 | Female | 13 | ID         | Yes (horizontal eyebrows, deep set eyes, anteverted nostrils, pointed chin)                    | Skeletal anomalies, fetal pads                                                     |
| #109 | Female | 5  | ID         | Yes (anteverted nostrils, broad nose root, long nasal filter)                                  | Language delay, psychomotor delay, clinodactyly V finger                           |
| #110 | Female | 24 | ID and ASD | Yes (microcephaly)                                                                             | Spastic-dystonic tetraparesis, scoliosis, motor stereotypies, bruxism, sialorrhea. |
| #111 | Male   | 12 | ID and ASD | Yes (Mild hirsutism localized to the face, anteverted nostrils, triangular facies, large ears) | Motor stereotypies, psychomotor delay, epilepsy, language delay                    |
| #112 | Female | 4  | ID         | Yes (microcephaly, deeply set eyes)                                                            | Growth delay, language delay                                                       |

|      |        |    |            |                                                                                                    |                              |
|------|--------|----|------------|----------------------------------------------------------------------------------------------------|------------------------------|
| #113 | Female | 5  | ID         | Yes (sparse eyebrows, long eyelashes, prominent ears)                                              | Language delay               |
| #114 | Female | 18 | ID         | No                                                                                                 | Epilepsy, motor stereotypies |
| #115 | Male   | 14 | ID and ASD | No                                                                                                 | No                           |
| #116 | Female | 6  | ID and ASD | No                                                                                                 | Language regression          |
| #117 | Male   | 12 | ID         | Yes ( prominent ears, strabismus)                                                                  | Psychomotor delay            |
| #118 | Male   | 10 | ID and ASD | Yes (high hairline front, broad forehead, deeply set eyes, large mouth, macrostoma, lateral cleft) | No                           |
| #119 | Female | 6  | ID and ASD | No                                                                                                 | No                           |
| #120 | Male   | 26 | ID and ASD | No                                                                                                 | Epilepsy                     |
| #121 | Male   | 9  | ID and ASD | Yes (tubular nose, elongated face, hypotelorism, thin lips)                                        | Epilepsy, language delay     |
| #122 | Male   | 10 | ID and ASD | Yes (Broad forehead, anteverted nostrils, dental anomalies, uplifted earlobes)                     | Motor stereotypies           |
| #123 | Female | 9  | ID and ASD | No                                                                                                 | Language regression          |

|      |        |    |            |                                                                                                                 |                                                  |
|------|--------|----|------------|-----------------------------------------------------------------------------------------------------------------|--------------------------------------------------|
| #124 | Male   | 9  | ID and ASD | Yes (thick eyebrows thin upper lip and thick lower lip, deeply set eyes)                                        | Motor stereotypies, language delay               |
| #125 | Male   | 5  | ID and ASD | Yes (large nose, Broad nasal bridge, Anteverted nostrils, Flat philtrum)                                        | Language regression                              |
| #126 | Male   | 17 | ID and ASD | No                                                                                                              | Language delay, psychomotor delay                |
| #127 | Male   | 6  | ID and ASD | Yes (Macrocephaly)                                                                                              | No                                               |
| #128 | Male   | 5  | ID and ASD | Yes (Lateral thinning of eyebrows, broad nasal bridge, middle face hypoplasia, epicanthic fold, long eyelashes) | Syndactyly, language delay                       |
| #129 | Female | 9  | ID         | No                                                                                                              | Motor stereotypies                               |
| #130 | Male   | 6  | ID and ASD | No                                                                                                              | Hyperactivity, language delay, psychomotor delay |
| #131 | Female | 9  | ID         | Yes (Deep set eyes, High hairline front, broad nasal root)                                                      | syndactyly of the II-III toe, psychomotor delay  |
| #132 | Female | 5  | ID and ASD | No                                                                                                              | Motor stereotypies, language delay               |
| #133 | Female | 5  | ID and ASD | Yes (long eyelashes, anteverted nostrils, short philtrum, everted lip)                                          | Hypertrichosis, motor stereotypies               |
| #134 | Female | 8  | ID         | Yes (Deep set eyes, tubular nose, small mouth with thin lips)                                                   | Behaviour disorder                               |
| #135 | Male   | 5  | ID and ASD | Yes (upslanting of palpebral fissures, wide mouth, spaced teeth)                                                | Absent language, stereotypies                    |

|      |        |    |            |                                                                                                                                                                     |                                                                              |
|------|--------|----|------------|---------------------------------------------------------------------------------------------------------------------------------------------------------------------|------------------------------------------------------------------------------|
| #136 | Male   | 5  | ID and ASD | No                                                                                                                                                                  | Absent language                                                              |
| #137 | Female | 20 | ID and ASD | No                                                                                                                                                                  | Obesity                                                                      |
| #138 | Male   | 8  | ID and ASD | Yes (bulbous nasal tip, deeply set eyes, Cupid's bow)                                                                                                               | Ligamentous laxity                                                           |
| #139 | Male   | 8  | ID and ASD | Yes (Synophrys, Prognathism)                                                                                                                                        | Hypertrichosis                                                               |
| #140 | Male   | 7  | ID         | Yes (prominent columella, thin upper lip)                                                                                                                           | Language delay                                                               |
| #141 | Female | 7  | ID and ASD | No                                                                                                                                                                  | Hyperactivity, psychomotor delay                                             |
| #142 | Female | 21 | ID and ASD | Yes (low frontal hairline, thick eyebrows, broad nasal bridge with bulbous tip, widened nostrils, large mouth, thick lower lip, dental anomalies, dystrophic nails) | Language delay, hypoplasia of the corpus callosum, scoliosis, hypertrichosis |
| #143 | Male   | 11 | ID         | Yes (small forehead, thick eyebrows, narrow eyelids, thin upper lip, cleft lip , prognathism, prominent ears)                                                       | Muscle hypotonia                                                             |
| #144 | Female | 35 | ID         | No                                                                                                                                                                  | Epilepsy                                                                     |
| #145 | Male   | 28 | ID         | No                                                                                                                                                                  | No                                                                           |
| #146 | Male   | 11 | ID         | No                                                                                                                                                                  | Epilepsy, motor stereotypies                                                 |

|      |        |    |            |                                                                                               |                                                                                  |
|------|--------|----|------------|-----------------------------------------------------------------------------------------------|----------------------------------------------------------------------------------|
| #147 | Female | 8  | ID and ASD | No                                                                                            | Absent language, stereotypies, psychomotor delay                                 |
| #148 | Male   | 8  | ID         | No                                                                                            | Epilepsy, psychomotor delay                                                      |
| #149 | Male   | 6  | ID and ASD | Yes (horizontal eyebrows, anteverted nostrils, cupid's bow, elongated eyelid rims)            | Hyperactivity, psychomotor delay                                                 |
| #150 | Female | 8  | ID and ASD | Yes (wide forehead, deeply set eyes, short nose, anteverted nostrils, long filter, thin lips) | Language delay, psychomotor delay                                                |
| #151 | Male   | 9  | ID         | Yes (deeply set eyes, tubular nose, thin upper lip, pointed palate, dental abnormalities)     | Hyperactivity, behaviour disorder                                                |
| #152 | Male   | 18 | ID and ASD | Yes (strabismus)                                                                              | Repetitive movements, absent language                                            |
| #153 | Male   | 22 | ID and ASD | No                                                                                            | Anxiety disorder                                                                 |
| #154 | Male   | 8  | ID and ASD | No                                                                                            | Repetitive movements, psychomotor delay                                          |
| #155 | Male   | 21 | ID and ASD | Yes (face telangiectasias)                                                                    | Psychomotor retardation, behaviour disorder, hypercholesterolemia, hyperactivity |
| #156 | Male   | 11 | ID and ASD | No                                                                                            | Epilepsy, psychomotor retardation                                                |
| #157 | Male   | 7  | ID and ASD | No                                                                                            | Behaviour disorder,, motor stereotypies                                          |

|             |      |    |            |                                                     |                                                                                             |
|-------------|------|----|------------|-----------------------------------------------------|---------------------------------------------------------------------------------------------|
| <b>#158</b> | Male | 18 | ID and ASD | Yes (Horizontal eyebrows, synophria, low-set ears.) | Psychomotor retardation, language delay                                                     |
| <b>#159</b> | Male | 14 | ID and ASD | No                                                  | Repetitive behaviors, manual stereotypies, episodes of hetero aggression, psychomotor delay |
| <b>#160</b> | Male | 9  | ID and ASD | No                                                  | Language delay, stereotypies.                                                               |
| <b>#161</b> | Male | 12 | ID and ASD | No                                                  | Language delay                                                                              |
| <b>#162</b> | Male | 16 | ID and ASD | No                                                  | Neurodevelopmental regression, stereotypies.                                                |
| <b>#163</b> | Male | 21 | ID         | No                                                  | Developmental delay, unmotivated laughter and crying.                                       |
| <b>#164</b> | Male | 30 | ID and ASD | No                                                  | Manual and vocal stereotypies.                                                              |
| <b>#165</b> | Male | 27 | ID and ASD | No                                                  | No                                                                                          |
| <b>#166</b> | Male | 28 | ID and ASD | No                                                  | No                                                                                          |
| <b>#167</b> | Male | 7  | ID         | No                                                  | Psychomotor delay                                                                           |
| <b>#168</b> | Male | 8  | ID and ASD | Yes (small auricles, retrognathia)                  | Language delay, bilateral syndactyly II and III toes                                        |
| <b>#169</b> | Male | 19 | ID and ASD | No                                                  | Language delay, self-harm, bruxism.                                                         |



|             |        |    |            |    |                                                           |
|-------------|--------|----|------------|----|-----------------------------------------------------------|
| <b>#170</b> | Male   | 13 | ID and ASD | No | Language delay, social isolation, hyperphagia. self-harm. |
| <b>#171</b> | Male   | 8  | ID and ASD | No | Language delay, social isolation                          |
| <b>#172</b> | Female | 8  | ID         | No | Language delay, stereotypies, epilepsy                    |
| <b>#173</b> | Male   | 12 | ID and ASD | No | Syndactyly II-III toe, hyperactivity.                     |
| <b>#174</b> | Male   | 12 | ID and ASD | No | No                                                        |
| <b>#175</b> | Male   | 12 | ID and ASD | No | No                                                        |
| <b>#176</b> | Male   | 9  | ID and ASD | No | No                                                        |
| <b>#177</b> | Male   | 9  | ID and ASD | No | No                                                        |
| <b>#178</b> | Male   | 12 | ID         | No | Language delay, stereotypies                              |
| <b>#179</b> | Male   | 15 | ID and ASD | No | No                                                        |
| <b>#180</b> | Male   | 15 | ID and ASD | No | No                                                        |

|      |      |    |            |                                                                                                                                                                           |                                                             |
|------|------|----|------------|---------------------------------------------------------------------------------------------------------------------------------------------------------------------------|-------------------------------------------------------------|
| #181 | Male | 18 | ID and ASD | No                                                                                                                                                                        | Language delay, episodes of hetero aggression, stereotypies |
| #182 | Male | 15 | ID and ASD | No                                                                                                                                                                        | Absent language, stereotypies                               |
| #183 | Male | 23 | ID and ASD | No                                                                                                                                                                        | Language delay, seizures                                    |
| #184 | Male | 11 | ID and ASD | Yes (Low frontal hairline, thick eyebrows, long eyelashes, deeply set eyes, nose with bulbous tip, thick columella and hypoplastic nostrils, auricles with uplifted lobe) | Language delay                                              |
| #185 | Male | 9  | ID and ASD | No                                                                                                                                                                        | Language delay, stereotypies, apraxia                       |
| #186 | Male | 18 | ID and ASD | No                                                                                                                                                                        | No                                                          |
| #187 | Male | 8  | ID and ASD | No                                                                                                                                                                        | Absent language, stereotypies                               |
| #188 | Male | 13 | ID and ASD | No                                                                                                                                                                        | Hyperactivity, aortic coarctation                           |
| #189 | Male | 10 | ID and ASD | No                                                                                                                                                                        | Motor stereotypies, aggressiveness                          |
| #190 | Male | 9  | ID and ASD | Yes (bulbous nasal tip, broad bridge, long and narrow eyelids, high forehead)                                                                                             | Language delay                                              |

|             |        |    |            |                                                          |                                                                                                      |
|-------------|--------|----|------------|----------------------------------------------------------|------------------------------------------------------------------------------------------------------|
| <b>#191</b> | Male   | 9  | ID and ASD | Yes (flat occipitus)                                     | No                                                                                                   |
| <b>#192</b> | Male   | 8  | ID and ASD | Yes (anteverted nostrils)                                | Motor stereotypies, psychomotor regression, hyperactivity, language delay, clinodactyly of the V toe |
| <b>#193</b> | Male   | 9  | ID and ASD | Yes (scattered eyebrows, bulbous nasal tip , large eyes) | Language regression                                                                                  |
| <b>#194</b> | Male   | 9  | ID and ASD | Yes (macrocephaly)                                       | Language delay, motor stereotypies                                                                   |
| <b>#195</b> | Male   | 8  | ID and ASD | No                                                       | Manual stereotypies, language delay, psychomotor delay                                               |
| <b>#196</b> | Male   | 9  | ID and ASD | No                                                       | Language delay, psychomotor delay                                                                    |
| <b>#197</b> | Male   | 9  | ID and ASD | No                                                       | Repetitive movements                                                                                 |
| <b>#198</b> | Male   | 19 | ID and ASD | No                                                       | Language delay, hyperactivity, recurrent infections                                                  |
| <b>#199</b> | Female | 10 | ID and ASD | No                                                       | Psychomotor delay, language delay, repetitive movements                                              |
| <b>#200</b> | Male   | 9  | ID and ASD | No                                                       | Clinodactyly of the IV toe                                                                           |
