# Supplementary material for: Exome Sequencing in 200 Intellectual Disability/Autistic Patients: New Candidates and Atypical Presentations
Source: MDPI journal article supplement (doi:10.3390/brainsci11070936), 2021-07-16
Supplement: s1 [file s1]

**Tabel S4.** Uncertain variants identified by ES.

| Patient | Gene           | Transcript (hg19) | Genomic DNA position | Variant (HGVS) | Protein (HGVS) | Location (Exon /Intron) | Variant effect | dbSNP        | MAF (gnomAD%) | Origin    | CADD  | ClinVar                |
|---------|----------------|-------------------|----------------------|----------------|----------------|-------------------------|----------------|--------------|---------------|-----------|-------|------------------------|
| #196    | <i>ACSL4</i>   | NM_022977.2       | X:108925954          | c.523T>G       | p.(Phe175Val)  | 5                       | missense       | NR           | NR            | inherited | 24.3  | NR                     |
| #122    | <i>AFF2</i>    | NM_001169123.1    | X:148037970          | c.2365A>G      | p.(Lys799Glu)  | 12                      | missense       | rs782610217  | 0.00055 %     | ND        | 25.00 | NR                     |
| #50     | <i>AFF2</i>    | NM_002025.3       | X:148048468          | c.3062C>T      | p.(Thr1021Ile) | 15                      | missense       | NR           | 0.00055 %     | de novo   | 23.5  | NR                     |
| #147    | <i>ANK3</i>    | NM_020987.3       | 10:61834572          | c.6067G>A      | p.(Ala2023Thr) | 37                      | missense       | rs146929899  | 0.028 %       | de novo   | 14.65 | uncertain significance |
| #83     | <i>ARID1B</i>  | NM_001346813.1    | 6:157099307          | c.244C>A       | p.(Gln82Lys)   | 1                       | missense       | rs1460103880 | 0.0021 %      | inherited | 22.8  | NR                     |
| #150    | <i>ARID1B</i>  | NM_001346813.1    | 6:157495210          | c.3055G>A      | p.(Gly1019Ser) | 10                      | missense       | rs375023508  | 0.0018%       | de novo   | 24.5  | NR                     |
| #65     | <i>ATRX</i>    | NM_000489.3       | X:76875864           | c.5271G>T      | p.(Glu1757Asp) | 20                      | missense       | NR           | NR            | de novo   | 23.8  | NR                     |
| #52     | <i>ATRX</i>    | NM_000489.3       | X:76855024           | c.5812A>G      | p.(Lys1938Glu) | 25                      | missense       | NR           | NR            | de novo   | 19.48 | NR                     |
| #196    | <i>BCORL1</i>  | NM_001184772.2    | X:129154967          | c.3449A>G      | p.(Lys1150Arg) | 4                       | missense       | NR           | NR            | inherited | 16.4  | NR                     |
| #172    | <i>CABLES1</i> | NM_001100619.2    | 18:20716361          | c.635A>G       | p.(Asp212Gly)  | 1                       | missense       | NR           | NR            | de novo   | 24.2  | NR                     |
| #109    | <i>CACNA1A</i> | NM_023035.2       | 19:13409455          | c.3004G>A      | p.(Gly1002Arg) | 19                      | missense       | rs781006387  | 0.0025 %      | inherited | 23.1  | NR                     |

|      |                |                |             |           |                |    |                         |              |           |           |       |                           |
|------|----------------|----------------|-------------|-----------|----------------|----|-------------------------|--------------|-----------|-----------|-------|---------------------------|
| #60  | <i>CACNA1G</i> | NM_018896.4    | 17:48639046 | c.226C>A  | p.(Arg76Ser)   | 1  | missense                | NR           | NR        | de novo   | 23.9  | NR                        |
| #120 | <i>CACNA1H</i> | NM_021098.2    | 16:1250375  | c.923G>A  | p.(Arg308His)  | 7  | missense                | rs1332969846 | 0.00039 % | de novo   | 22.9  | NR                        |
| #183 | <i>CACNA1H</i> | NM_021098.2    | 16:1259249  | c.3581G>A | p.(Arg1194Gln) | 17 | missense                | rs759668583  | 0.0058 %  | inherited | 19.07 | uncertain<br>significance |
| #126 | <i>CAPRIN1</i> | NM_005898.4    | 11:34104424 | c.879G>A  | p.(Glu293=)    | 8  | potentially<br>splicing | NR           | NR        | de novo   | 25.4  | NR                        |
| #32  | <i>CENPJ</i>   | NM_018451.4    | 13:25484137 | c.656C>T  | p.(Pro219Leu)  | 4  | missense                | rs139844197  | 0.046 %   | inherited | 14.6  | uncertain<br>significance |
| #32  | <i>CENPJ</i>   | NM_018451.4    | 13:25480327 | c.1849C>T | p.(Pro617Ser)  | 7  | missense                | rs573822147  | 0.026 %   | inherited | 26.4  | NR                        |
| #74  | <i>CSNK2A1</i> | NM_177559.2    | 20:472938   | c.581C>A  | p.(Ser194Tyr)  | 9  | missense                | NR           | NR        | de novo   | 28.7  | NR                        |
| #9   | <i>CTU2</i>    | NM_001012759.2 | 16:88779836 | c.854C>A  | p.(Ala285Asp)  | 8  | missense                | rs780088546  | 0.00079 % | inherited | 31,00 | NR                        |
| #110 | <i>DEAF1</i>   | NM_021008.3    | 11:686911   | c.751G>A  | p.(Asp251Asn)  | 5  | missense                | NR           | NR        | de novo   | 26.6  | NR                        |
| #123 | <i>DNM1L</i>   | NM_012062.4    | 12:32861094 | c.305C>T  | p.(Thr102Met)  | 4  | missense                | rs201929226  | 0.028 %   | de novo   | 25,00 | uncertain<br>significance |
| #70  | <i>FGD1</i>    | NM_004463.2    | X:54496520  | c.1030G>A | p.(Asp344Asn)  | 4  | missense                | rs781588464  | 0.0011 %  | inherited | 22.8  | NR                        |
| #131 | <i>GRIN1</i>   | NM_000832.6    | 9:140056963 | c.1859G>A | p.(Gly620Glu)  | 14 | missense                | NR           | NR        | de novo   | 25.9  | NR                        |

|      |        |                |                         |                |                |    |                  |              |           |           |       |                        |
|------|--------|----------------|-------------------------|----------------|----------------|----|------------------|--------------|-----------|-----------|-------|------------------------|
| #72  | HUWE1  | NM_031407.5    | X:53631745              | c.2547C>G      | p.(Asp849Glu)  | 26 | missense         | NR           | NR        | inherited | 18.36 | NR                     |
| #34  | MECP2  | NM_001110792.1 | X:153296857             | c.458A>C       | p.(Tyr153Ser)  | 4  | missense         | NR           | NR        | de novo   | 26.4  | NR                     |
| #139 | MED12  | NM_005120.2    | X: 70360696-70360988del | c.6256_6258del | p.(Gln2086del) | 42 | inframe deletion | rs1246803647 | 0.021 %   | de novo   | NA    | NR                     |
| #59  | MYCN   | NM_001293228.1 | 2:16082569              | c.383G>A       | p.(Arg128His)  | 2  | missense         | rs771914958  | 0.0012 %  | de novo   | 31,00 | NR                     |
| #143 | NBEA   | NM_015678.4    | 13:36239272             | c.8350G>T      | p.(Val2784Phe) | 56 | missense         | rs41292207   | 0.27 %    | de novo   | 26.2  | NR                     |
| #53  | PHF6   | NM_001015877.1 | X:133512133             | c.237G>C       | p.(Lys79Asn)   | 3  | missense         | NR           | NR        | inherited | 25,00 | NR                     |
| #163 | PLCL2  | NM_015184.5    | 3:17131351              | c.2953C>T      | p.(Arg985Cys)  | 6  | missense         | rs753953891  | 0.0008 %  | de novo   | 31,00 | NR                     |
| #60  | PTCHD1 | NM_173495.2    | X:23398227              | c.871G>A       | p.(Asp291Asn)  | 2  | missense         | rs1341244854 | 0.00055 % | inherited | 24.6  | NR                     |
| #151 | RBMX   | NM_002139.3    | X: 135956411            | c.1066G>T      | p.(Gly356Trp)  | 9  | missense         | rs35085326   | 0.92 %    | de novo   | 26.5  | NR                     |
| #114 | SCN2A  | NM_001040143.2 | 2:166234150             | c.4298A>T      | p.(Asp1433Val) | 23 | missense         | NR           | NR        | de novo   | 25.6  | NR                     |
| #153 | SCN2A  | NM_001040143.2 | 2:166226780             | c.3820T>G      | p.(Trp1274Gly) | 20 | missense         | NR           | NR        | de novo   | 31,00 | NR                     |
| #66  | SCN11A | NM_001349253.1 | 3:38892017              | c.4282G>A      | p.(Gly1428Ser) | 29 | missense         | rs201336927  | 0.020 %   | inherited | 29.2  | uncertain significance |

|      |         |                |             |            |                |    |                      |             |           |           |       |    |
|------|---------|----------------|-------------|------------|----------------|----|----------------------|-------------|-----------|-----------|-------|----|
| #54  | SHANK3  | NM_001080420.1 | 22:51121780 | c.898C>T   | p.(Arg300Cys)  | 8  | missense             | rs376862893 | 0.0097 %  | de novo   | 31,00 | NR |
| #70  | SLC9A7  | NM_032591.2    | X:46502684  | c.1600T>C  | p.(Trp534Arg)  | 12 | missense             | rs138701264 | 0.026 %   | inherited | 28.1  | NR |
| #166 | SLC12A2 | NM_001046.2    | 5:127503529 | c.2693G>A  | p.(Arg898Lys)  | 18 | missense             | rs762787955 | 0.00041 % | de novo   | 20.5  | NR |
| #186 | SOX3    | NM_005634.2    | X:139587213 | c.13C>G    | p.(Arg5Gly)    | 1  | missense             | NR          | NR        | inherited | 15.88 | NR |
| #167 | TMLHE   | NM_018196.3    | X:154754267 | c.208C>T   | p.(Arg70Cys)   | 3  | missense             | rs200585049 | 0.030 %   | inherited | 24.2  | NR |
| #77  | TH      | NM_000360.3    | 11:2185521  | c.1436T>A  | p.(Leu479Gln)  | 14 | missense             | NR          | NR        | inherited | 24.8  | NR |
| #77  | TH      | NM_000360.3    | 11:2189316  | c.576+5G>C | NA             | 5  | potentially splicing | NR          | NR        | inherited | NA    | NR |
| #67  | TRIO    | NM_007118.3    | 5:14479388  | c.6172T>A  | p.(Tyr2058Asn) | 42 | missense             | NR          | NR        | de novo   | 29.9  | NR |
| #56  | ZNF462  | NM_021224.5    | 9:109689704 | c.3511G>C  | p.(Ala1171Pro) | 3  | missense             | NR          | NR        | de novo   | 20.7  | NR |
| #148 | ZNF711  | NM_021998.4    | X:84502643  | c.65T>C    | p.(Ile22Thr)   | 3  | missense             | NR          | NR        | inherited | 6.8   | NR |

HGVS, Human Genome Variation Society (<http://www.hgvs.org>) ; ClinVar Clinical Variation database (<https://www.ncbi.nlm.nih.gov/ClinVar/>); MAF (Minor Allele Frequency); CADD (Combined Annotation Dependent Depletion); NA, not applicable; ND, not determined; NR, not reported
