# Supplementary material for: Exome Sequencing in 200 Intellectual Disability/Autistic Patients: New Candidates and Atypical Presentations
Source: MDPI journal article supplement (doi:10.3390/brainsci11070936), 2021-07-16
Supplement: s1 [file s1]

**Table S2.** P/LP variants identified in disease genes.

| Patient | Gene    | Status       | Transcript (hg19) | genomic DNA position   | Variant (HGVS) | Protein (HGVS)     | Location (Exon /Intron) | Variant effect | dbSNP        | MAF (gnomAD %) | CADD | origin    | ClinVar    | References              |
|---------|---------|--------------|-------------------|------------------------|----------------|--------------------|-------------------------|----------------|--------------|----------------|------|-----------|------------|-------------------------|
| #1      | ADNP    | heterozygous | NM_015339.2       | 20:49508937            | c.2314dup      | p.(Thr772Asnfs*16) | 5                       | frameshift     | NR           | NR             | NA   | ND        | NR         | NR                      |
| #2      | AP4M1   | heterozygous | NM_004722.3       | 7:99704400_99704425del | c.1257_1282del | p.(Val421Alafs*98) | 15                      | frameshift     | rs977969791  | NR             | NA   | inherited | NR         | NR                      |
| #2      | AP4M1   | heterozygous | NM_004722.3       | 7:99704460             | c.1317G>A      | p.(Trp439*)        | 15                      | nonsense       | rs772119268  | 0.00040 %      | NA   | inherited | NR         | NR                      |
| #3      | ATPIA3  | heterozygous | NM_152296.4       | 19:42479928            | c.2116G>A      | p.(Gly706Arg)      | 16                      | missense       | rs782175860  | NR             | 25.1 | de novo   | Pathogenic | [Hully et al., 2017]    |
| #4      | BCOR    | hemizygosis  | NM_017745.5       | X: 39933823            | c.776C>T       | p.(Ser259Leu)      | 4                       | missense       | rs727503826  | 0 %            | 25.3 | de novo   | Pathogenic | NR                      |
| #5 #6   | BSCL2   | homozygous   | NM_032667.6       | 11:62458571            | c.856C>T       | p.(Arg286*)        | 8                       | nonsense       | rs763070770  | 0.0016 %       | NA   | inherited | NR         | NR                      |
| #7      | CACNA1A | heterozygous | NM_000068.3       | 19:13373594            | c.4055G>A      | p.(Arg1352Gln)     | 25                      | missense       | rs1057520918 | NR             | 32   | de novo   | Pathogenic | [Stubberudet al., 2021] |
| #8      | CSNK2B  | heterozygous | NM_001320.6       | 6:31635742             | c.170del       | p.(Glu57Glyfs*15)  | 3                       | frameshift     | NR           | NR             | NA   | de novo   | NR         | NR                      |
| #9      | CTU2    | heterozygous | NM_001012759.2    | 16:88780062            | c.881C>A       | p.(Ser294*)        | 9                       | nonsense       | rs201111272  | 0.019 %        | NA   | inherited | NR         | NR                      |
| #10     | DEPDC5  | heterozygous | NM_001242896.1    | 22:32210985            | c.1453C>T      | p.(Arg485*)        | 21                      | nonsense       | rs1568991466 | NR             | NA   | de novo   | Pathogenic | NR                      |
| #11     | DDX3X   | heterozygous | NM_001356.4       | X:41203603             | c.976C>T       | p.(Arg326Cys)      | 10                      | missense       | rs1555953548 | NR             | 32   | de novo   | Pathogenic | NR                      |

|            |        |              |                |                         |              |                      |    |            |              |           |      |           |                                                             |                         |
|------------|--------|--------------|----------------|-------------------------|--------------|----------------------|----|------------|--------------|-----------|------|-----------|-------------------------------------------------------------|-------------------------|
| #12        | DYRK1A | heterozygous | NM_001396.3    | 21:38878524             | c.1669C>T    | p.(Gln557*)          | 10 | nonsense   | NR           | NR        | NA   | de novo   | NR                                                          | NR                      |
| #13        | EFTUD2 | heterozygous | NM_004247.3    | 17:42956923             | c.702+1G>A   | NA                   | 9  | splicing   | NR           | NR        | NA   | de novo   | NR                                                          | NR                      |
| #14        | FGFR3  | heterozygous | NM_000142.4    | 4:1803571               | c.749C>G     | p.(Pro250Arg)        | 7  | missense   | rs4647924    | 0.00074 % | 22.1 | de novo   | Pathogenic/<br>Likely pathogenic                            | [Aravidis et al., 2014] |
| #15        | HK1    | heterozygous | NM_033496.2    | 10:71142347             | c.1367C>T    | p.(Thr456Met)        | 10 | missense   | rs1057517928 | NR        | 31   | de novo   | Pathogenic/<br>Likely pathogenic                            | [Okur et al., 2019]     |
| #16        | IQSEC2 | heterozygous | NM_001111125.2 | X:53264088              | c.3780del    | p.(Gln1261Serfs*136) | 15 | frameshift | NR           | NR        | NA   | de novo   | NR                                                          | NR                      |
| #17        | KANSL1 | heterozygous | NM_001193466.1 | 17:44248524_44248525del | c.985_986del | p.(Leu329Glufs*22)   | 2  | frameshift | rs281865473  | 0.0028 %  | NA   | de novo   | Pathogenic/<br>Uncertain significance                       | [Koolen et al.,2016]    |
| #18        | KCNQ3  | heterozygous | NM_004519.3    | 8: 133192493            | c.688C>T     | p.(Arg230Cys)        | 5  | missense   | rs796052676  | NR        | 31   | de novo   | Pathogenic/<br>Likely pathogenic                            | NR                      |
| #19        | KIF1A  | heterozygous | NM_001244008.1 | 2:241737133             | c.37C>T      | p.(Arg13Cys)         | 1  | missense   | rs1064794935 | NR        | 32   | de novo   | Likely pathogenic/<br>Pathogenic/<br>Uncertain significance | [Kurihara et al.,2020]  |
| #20<br>#21 | KIF1A  | heterozygous | NM_001244008.1 | 2:241715312             | c.914C>T     | p.(Pro305Leu)        | 11 | missense   | rs1131690804 | NR        | 27.4 | de novo   | Pathogenic/<br>Likely pathogenic                            | [Spagnoli et al., 2019] |
| #22        | KMT2A  | heterozygous | NM_001197104.1 | 11:118365075            | c.5256del    | p.(Ala1753Profs*70)  | 17 | frameshift | NR           | NR        | NA   | de novo   | NR                                                          | NR                      |
| #23        | MBOAT7 | heterozygous | NM_024298.4    | 19:54687420             | c.477C>G     | p.(Tyr159*)          | 5  | nonsense   | NR           | NR        | NA   | inherited | NR                                                          | NR                      |
| #24        | MED13L | heterozygous | NM_015335.4    | 12:116714864            | c.72+1G>T    | NA                   | 1  | splicing   | NR           | NR        | NA   | de novo   | NR                                                          | NR                      |

|                   |         |              |                |                          |                |                    |    |            |              |          |      |           |                                     |                        |
|-------------------|---------|--------------|----------------|--------------------------|----------------|--------------------|----|------------|--------------|----------|------|-----------|-------------------------------------|------------------------|
| #25               | MMACHC  | homozygous   | NM_015506.2    | 1:45974478               | c.440G>C       | p.(Gly147Ala)      | 4  | missense   | rs140522266  | 0.032 %  | 24   | inherited | Pathogenic/<br>Likely<br>pathogenic | NR                     |
| #26<br>#27<br>#28 | POGZ    | heterozygous | NM_015100.3    | 1:151397435_151397436del | c.1180_1181del | p.(Met394Valfs*9)  | 8  | frameshift | rs1057518170 | NR       | NA   | inherited | Pathogenic                          | NR                     |
| #29               | PTPN11  | heterozygous | NM_002834.3    | 12:112926851             | c.1471C>A      | p.(Pro491Thr)      | 13 | missense   | rs397507539  | NR       | 23.1 | de novo   | Pathogenic/<br>Likely<br>pathogenic | NR                     |
| #30               | RHOBTB2 | heterozygous | NM_015178.2    | 8:22865140               | c.1382G>A      | p.(Arg461His)      | 9  | missense   | rs1554504663 | NR       | 29.1 | de novo   | Pathogenic/<br>Likely<br>pathogenic | NR                     |
| #31               | SHANK3  | heterozygous | NM_001080420.1 | 22:51158930_51158931dup  | c.2717_2718dup | p.(Ser907Alafs*3)  | 21 | frameshift | NR           | NR       | NA   | de novo   | NR                                  | NR                     |
| #32               | SHANK3  | heterozygous | NM_033517.1    | 22:51153476              | c.2313+1G>A    | NA                 | 19 | splicing   | rs1396379503 | 0.0012 % | NA   | de novo   | Pathogenic/<br>Likely<br>pathogenic | NR                     |
| #33               | SHANK3  | heterozygous | NM_001080420.1 | 22:51159463_51159466del  | c.3250_3253del | p.(Leu1084Cysfs*9) | 22 | frameshift | NR           | NR       | NA   | de novo   | NR                                  | NR                     |
| #34               | SPG7    | heterozygous | NM_003119.2    | 20:89576947              | c.233T>A       | p.(Leu78*)         | 2  | nonsense   | rs121918358  | 0.040 %  | NA   | inherited | Pathogenic                          | [Balicza et al., 2016] |
| #35               | SPTBN2  | heterozygous | NM_006946.2    | 11:66475652              | c.1310G>A      | p.(Arg437Gln)      | 11 | missense   | NR           | NR       | 28.8 | ND        | NR                                  | [Accogli et al., 2020] |
| #36               | SYNGAPI | heterozygous | NM_006772.2    | 6:33410665               | c.2337-1G>A    | NA                 | 14 | splicing   | NR           | NR       | NA   | de novo   | NR                                  | NR                     |
| #37               | TBCE    | heterozygous | NM_001079515.1 | 1:235564851dup           | c.134dup       | p.(Arg46Glufs*5)   | 3  | frameshift | NR           | NR       | NA   | de novo   | NR                                  | NR                     |
| #37               | TBCE    | homozygous   | NM_001079515.1 | 1:235590458              | c.464T>A       | p.(Ile155Asn)      | 6  | missense   | rs780472451  | 0 %      | 25.6 | inherited | Pathogenic                          | [Sferra et al., 2016]  |
| #38               | TREX1   | heterozygous | NM_016381.3    | 3:48508447_48508462del   | c.558_573del   | p.(Phe186Leufs*24) | 1  | frameshift | NR           | NR       | NA   | inherited | NR                                  | NR                     |

|     |        |              |                |                      |                |                    |    |            |             |          |      |           |                                  |    |
|-----|--------|--------------|----------------|----------------------|----------------|--------------------|----|------------|-------------|----------|------|-----------|----------------------------------|----|
| #39 | TUBA1A | heterozygous | NM_001270399.1 | 12:49580116          | c.352G>A       | p.(Val118Met)      | 3  | missense   | rs863224938 | NR       | 26.2 | de novo   | Pathogenic/<br>Likely pathogenic | NR |
| #40 | UPF3B  | hemizygosis  | NM_080632.2    | X:118971734          | c.1288C>T      | p.(Arg430*)        | 10 | nonsense   | rs122468181 | NR       | NA   | inherited | Likely pathogenic                | NR |
| #41 | WDR45  | heterozygous | NM_001029896.1 | X:48935560           | c.66del        | p.(Cys23Alafs*15)  | 5  | frameshift | NR          | NR       | NA   | de novo   | NR                               | NR |
| #42 | WFS1   | heterozygous | NM_006005.3    | 4:6279306            | c.124C>T       | p.(Arg42*)         | 2  | nonsense   | rs71530923  | 0.0097 % | NA   | ND        | Pathogenic/<br>Likely pathogenic | NR |
| #43 | WFS1   | heterozygous | NM_006005.3    | 4:6302752_6302755del | c.1230_1233del | p.(Leu412Serfs*29) | 8  | frameshift | rs760337383 | 0.0035 % | NA   | ND        | Pathogenic                       | NR |

HGVS, Human Genome Variation Society (<http://www.hgvs.org>) ; ClinVar Clinical Variation database (<https://www.ncbi.nlm.nih.gov/ClinVar/>); MAF (Minor Allele Frequency); CADD (Combined Annotation Dependent Depletion); NA, not applicable; ND, not determined; NR, not reported
